# Supplementary material
Source: PubMed Central journal article supplement (PMC2527121)

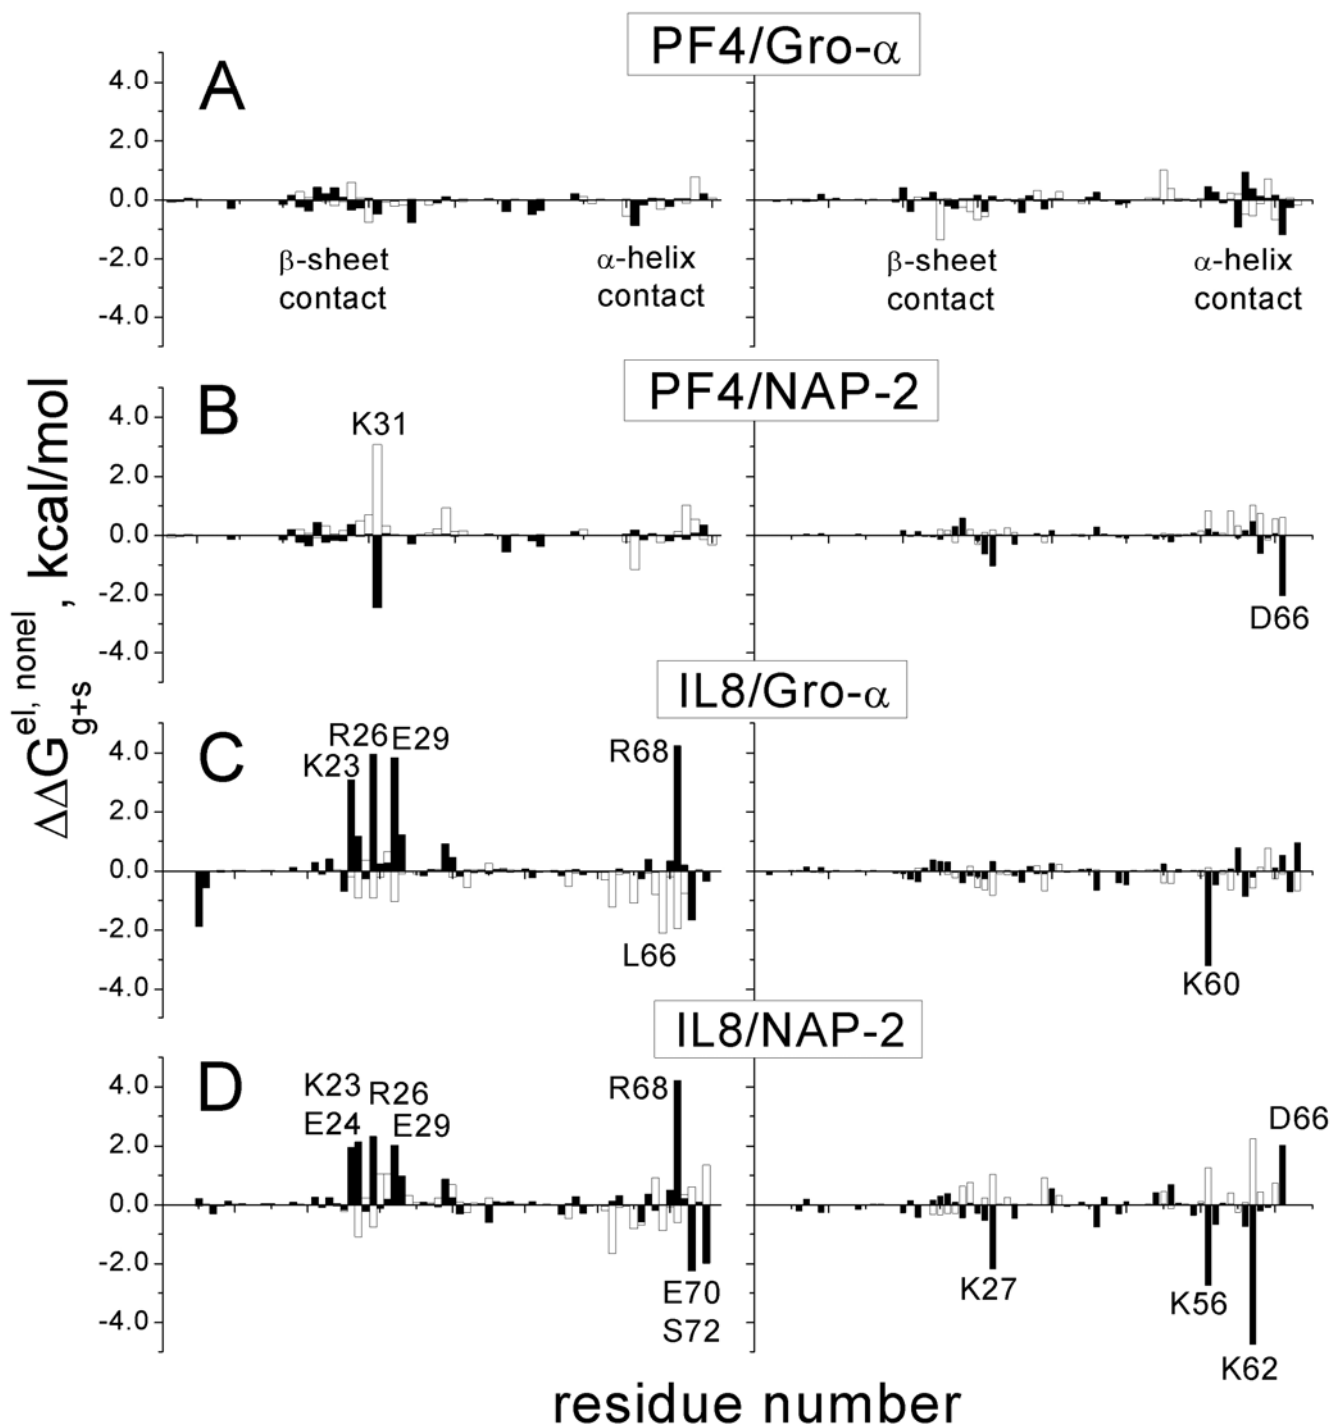

**Figure 1 (Supplemental Section)**

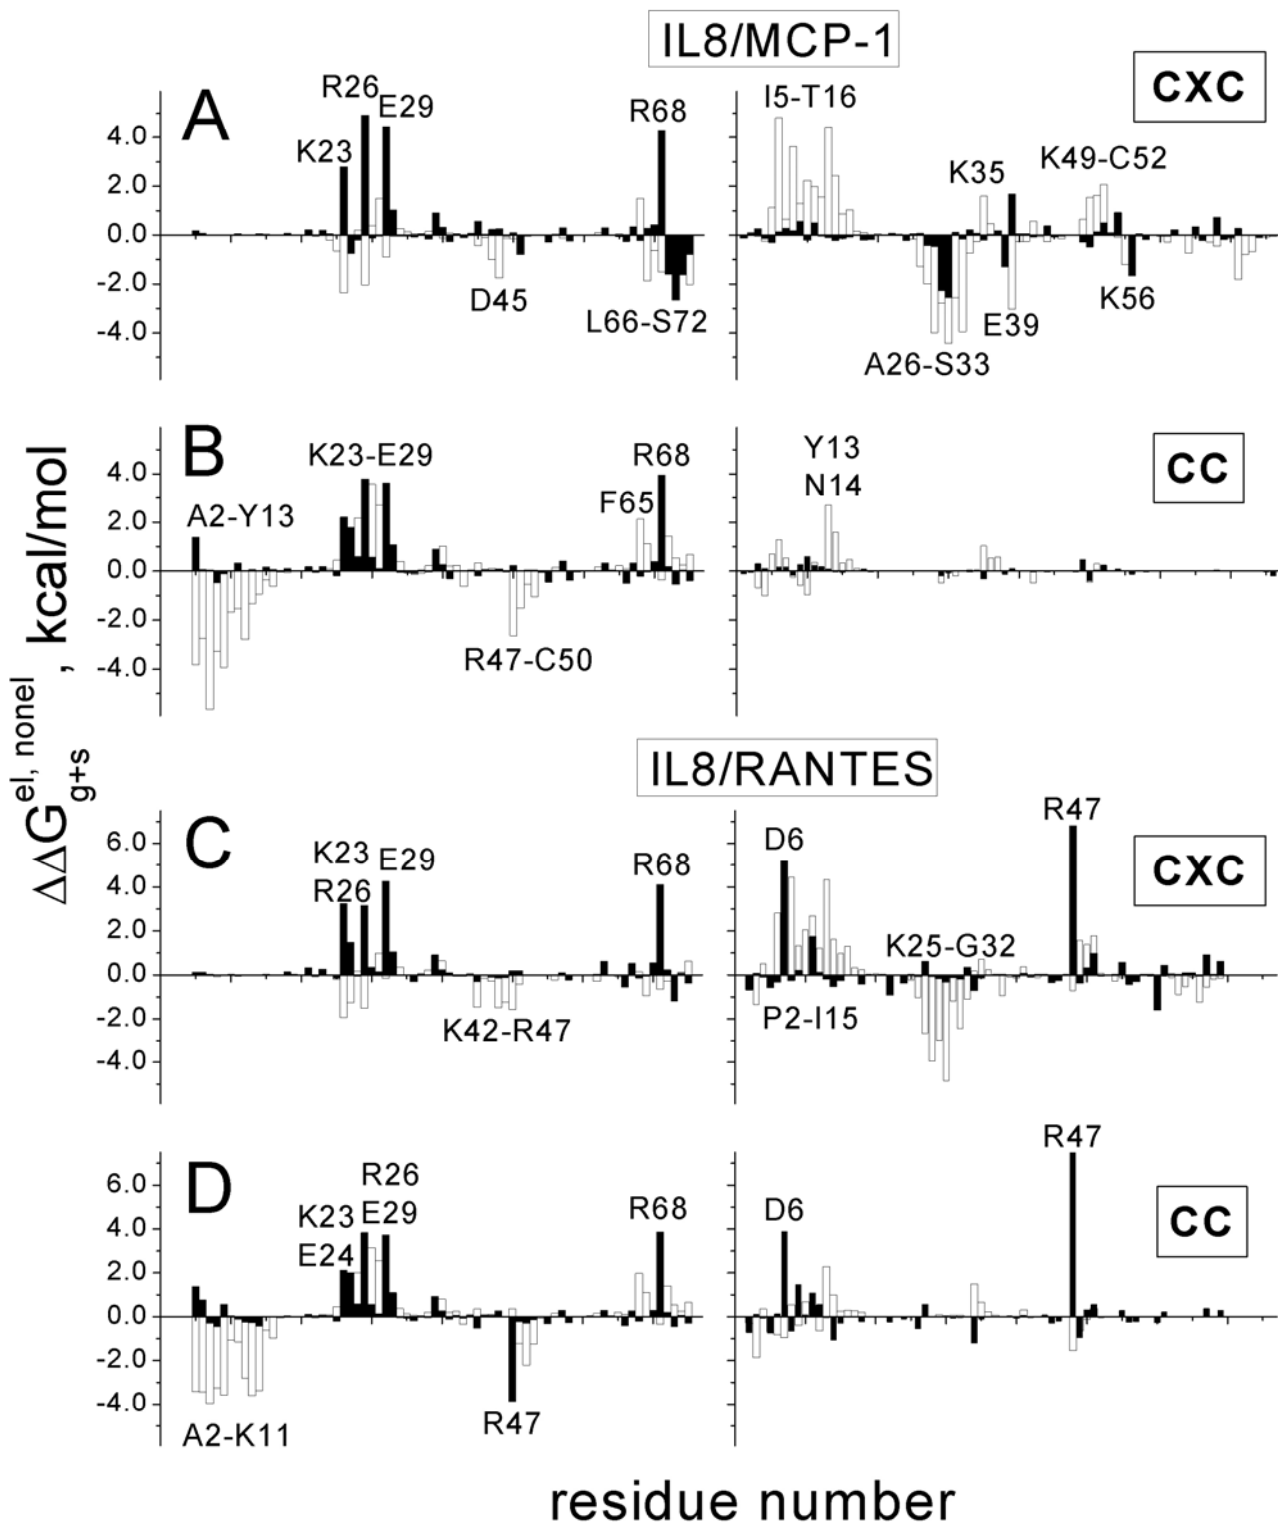

**Figure 2 (Supplemental Section)**

Supplement: supp_M803308200_suppdata.pdf [file supp_M803308200_suppdata.pdf]
